# Supplementary material for: Self-assembled pearl-necklace patterned upconverting nanocrystals with highly efficient blue and ultraviolet emission: femtosecond laser based upconversion properties
Source: Royal Society of Chemistry journal article supplement (doi:10.1039/c9ra06389g), 2019-01-01
Supplement: c9ra06389g1.pdf [file c9ra06389g1.pdf]

ARTICLE

## Self-assembled Pearl-necklace patterned upconverting nanocrystals with highly efficient blue and ultraviolet emission: femtosecond laser based upconversion properties

Received 00th January 20xx,  
Accepted 00th January 20xx

DOI: 10.1039/x0xx00000x

Monami Das Modak<sup>a,b</sup>, Ganesh Damarla<sup>c</sup>, Somedutta Maity<sup>b</sup>, Anil K Chaudhary<sup>c</sup> and Pradip Paik<sup>a,b\*</sup>

### Supplementary information:

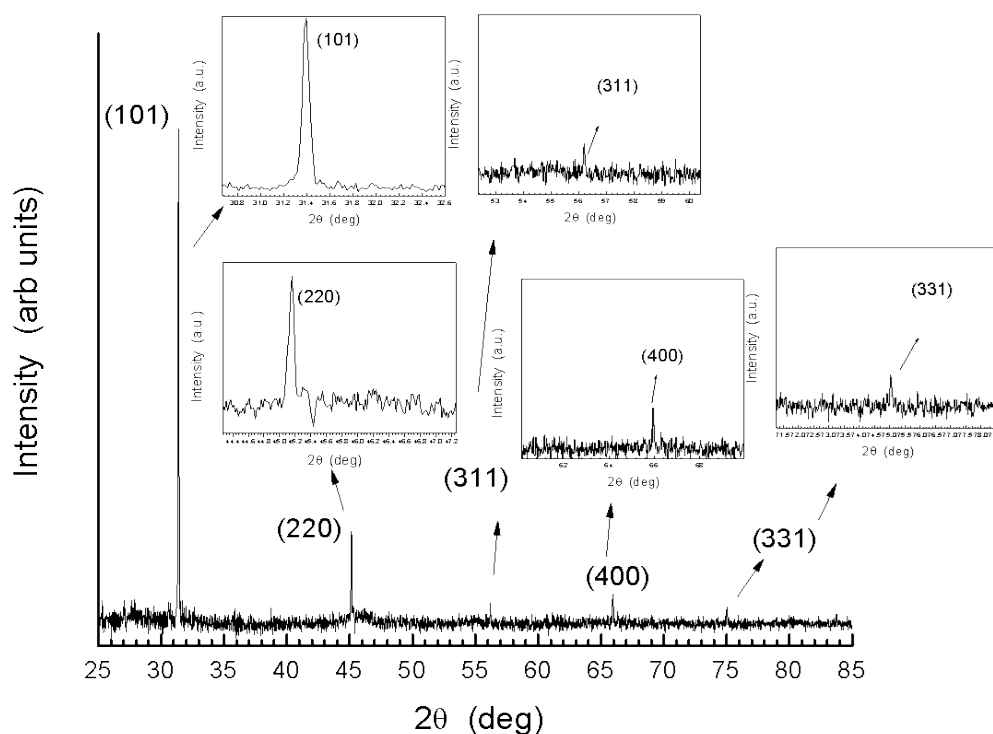

<sup>a</sup> School of Biomedical Engineering, Indian Institute of Technology (IIT)-BHU, Varanasi, UP, PIN 221005

<sup>b</sup> School of Engineering Sciences and Technology, University of Hyderabad, Hyderabad, Telangana, PIN: 500046

<sup>c</sup> Advanced Center of Research in High Energy Materials, University of Hyderabad, Hyderabad, Telangana, PIN: 500046

† Footnotes relating to the title and/or authors should appear here.

Electronic Supplementary Information (ESI) available: [details of any supplementary information available should be included here]. See DOI: 10.1039/x0xx00000x

Fig. S1 XRD study of synthesized UCN-PNs confirms the crystalline structure. Insets show the observed peaks with their corresponding crystalline planes according to JCPDS-028-1192

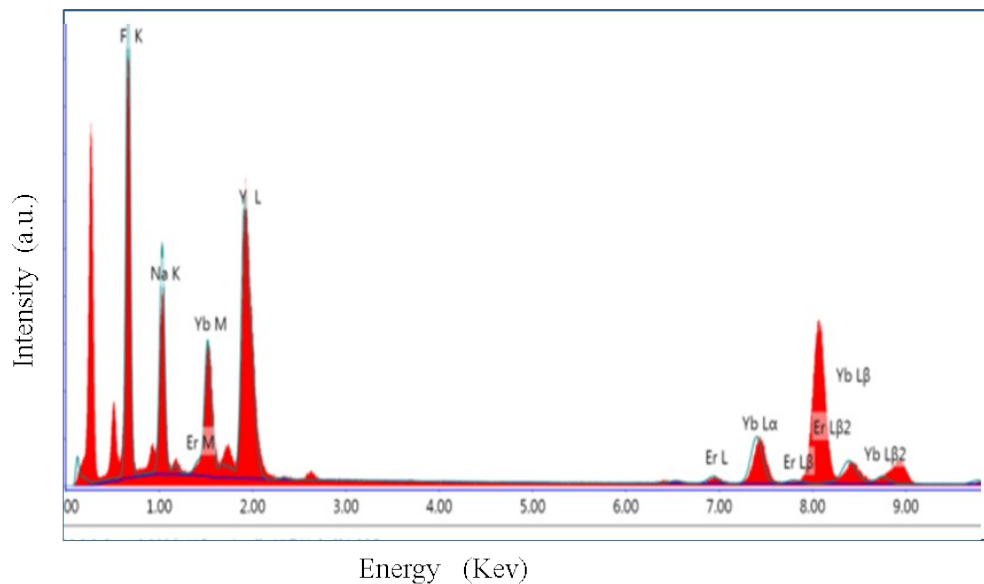

Fig. S2 EDXA spectrum of UCN-PNs confirming the presence of elements

Table S1 Elemental compositions observed in EDAX spectrum

| Element | Weight (%) | Atomic (%) |
|---------|------------|------------|
| F       | 44.79      | 49.97      |
| Na      | 54.05      | 49.83      |
| Er      | 0.11       | 0.01       |
| Yb      | 0.62       | 0.08       |
| Y       | 0.42       | 0.1        |

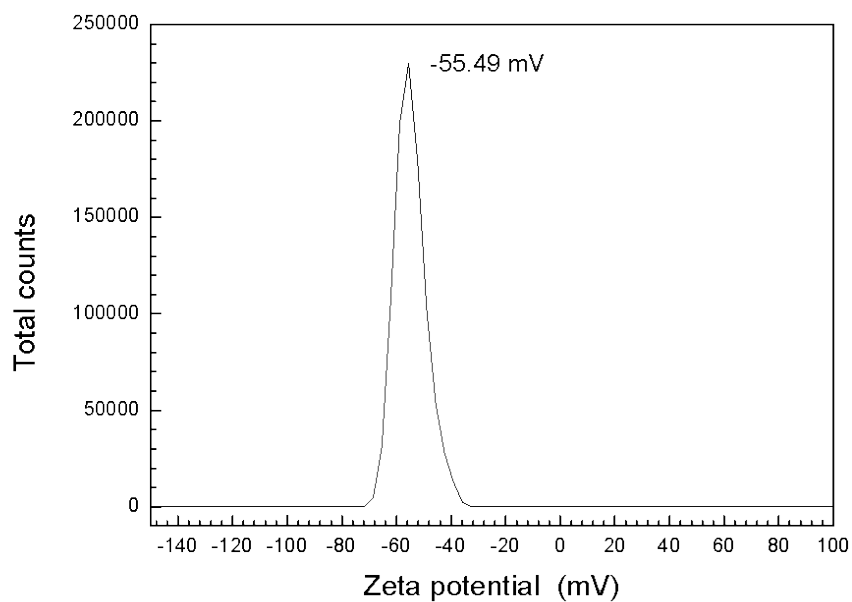

Fig. S3 Zeta potential value found to be -55.49 mV for colloidal aqua solution of UCN-PNs

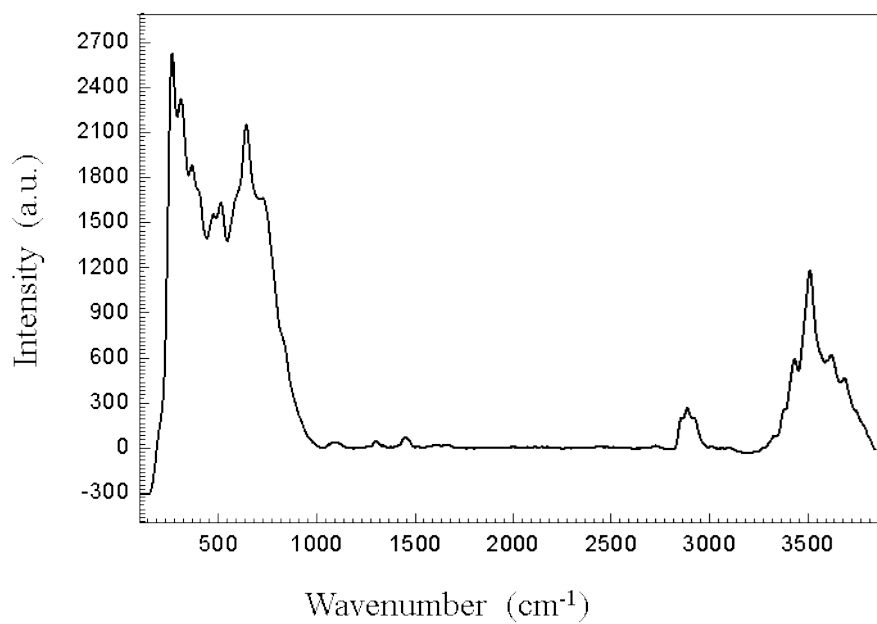

Fig. S4 Raman spectrum of UCN-PNs with entire region

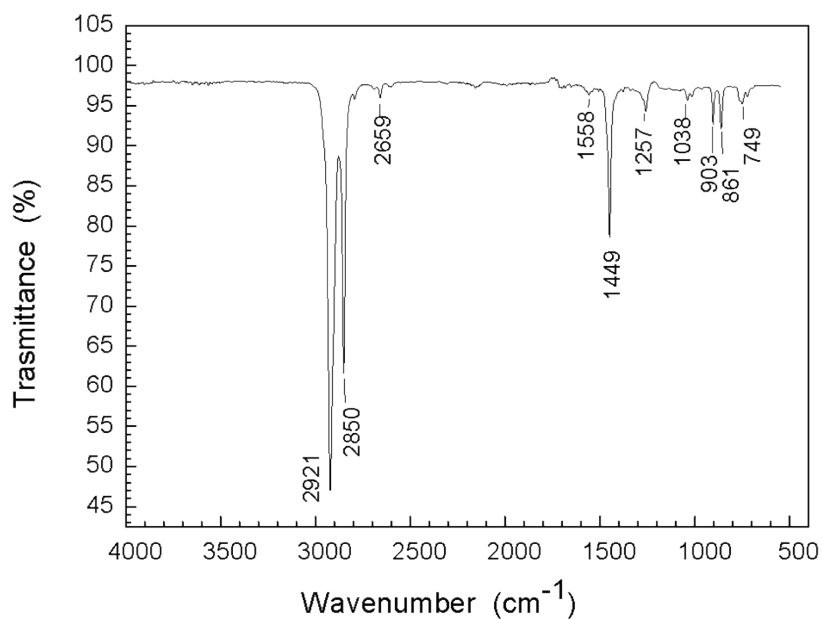

Fig. S5 FTIR spectrum of UCN-PNs confirming the presence of different groups in oleic acid and formation of UCNPs

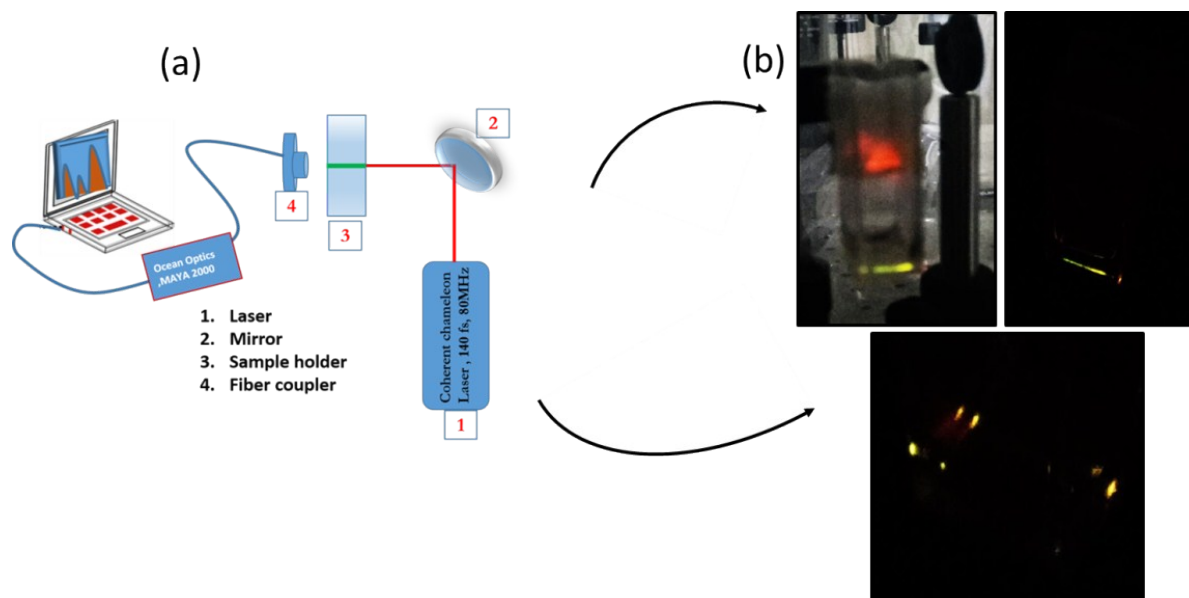

Fig. S6 (a) Schematic of Femtosecond laser (Fs) set-up arrangement excited with Fs-laser sources.

(b) Images are captured while visible emissions are observed in cuvette-sample once it is

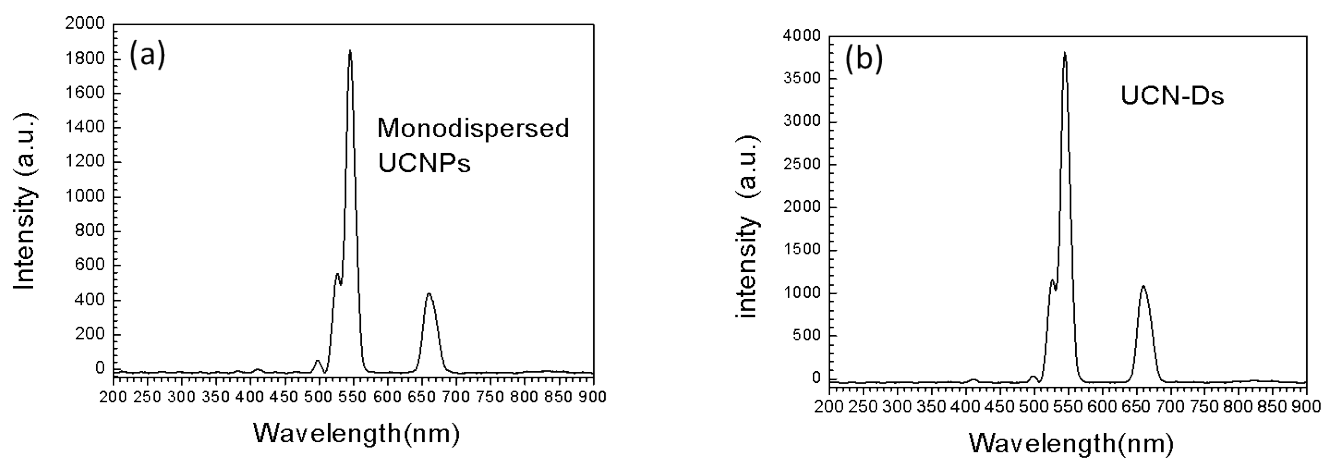

Fig. S7 Upon excitation with 980nm CW wave source the obtained upconversion emission spectra for (a) monodispersed UCNP's (b) synthesized necklace-UCNP's; The highest intensity in Fig ( b) is 2 times higher than that observed in Fig. (a)
